# Supplementary material
Source: Springer Nature journal article supplement (https://www.springermedizin.de/resource/supplementary/13049_2011_323_MOESM1_ESM.pdf/9666514)

10 km

Ringerike hospital  
(local hospital)

Sundvollen hotel

Utøya island

- 1 - OUH-Rikshospitalet
- 2 - Diakonhjemmet  
(local hospital)
- 3 - Lovisenberg hospital  
(local hospital)
- 4 - OUH-Aker

- - Ambulance base
- - Air ambulance base
- ⊕ - Hospital

OUH-ULlevål  
(trauma centre)

Akershus  
university  
hospital  
(regional  
hospital)

Asker og Bærum hospital  
(local hospital)

Drammen hospital  
(regional hospital)

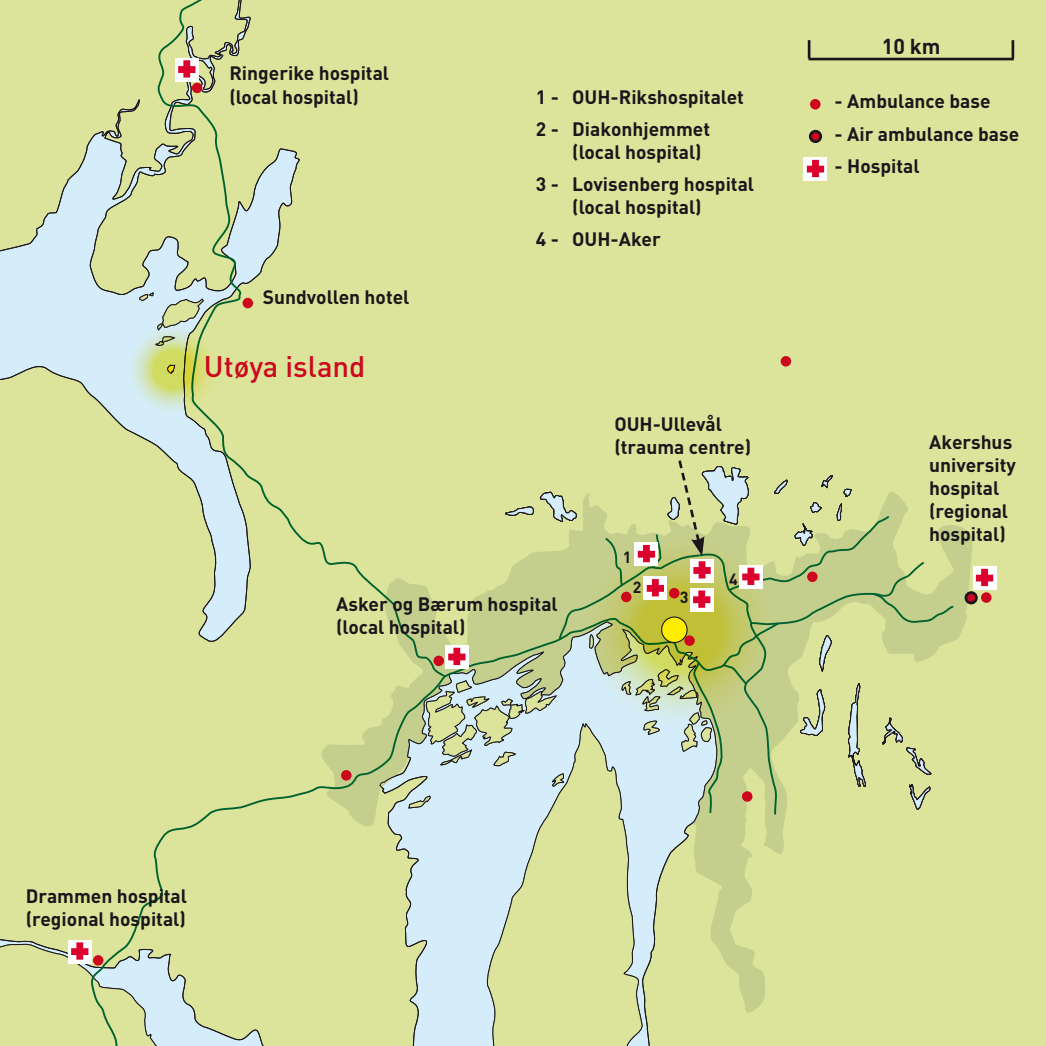

Supplement: MOESM1 [file 9666514]
